# Supplementary material for: Relations of Distinct Psychopathic Personality Traits with Anxiety and Fear: Findings from Offenders and Non-Offenders
Source: PLoS One. 2015 Nov 16;10(11):e0143120. doi: 10.1371/journal.pone.0143120 (PMC4646576; doi:10.1371/journal.pone.0143120)
Supplement: S1 File — (XLSX) [file pone.0143120.s001.xlsx]

## Sheet: Sheet1
Gender	Age	Egocentric	Callous	Antisocial	FearAnxiety	Avoidance	TraitAnxiety	StateAnxiety	ZEgocentric	ZCallous	ZAntisocial	ZAntisocialXGender	ZCallousXGender	ZEgocentricXGender
1	21	16	4	11	37	27	49	46	-0.73762	-0.60955	0.21482	0.21	-0.61	-0.74
1	20	22	6	15	38	29	57	77	0.40179	0.78581	1.68122	1.68	0.79	0.4
1	20	27	6	9	15	4	35	30	1.3513	0.78581	-0.51839	-0.52	0.79	1.35
1	20	29	7	8	25	25	41	40	1.7311	1.48349	-0.88499	-0.88	1.48	1.73
1	19	20	5	8	14	15	41	33	0.02199	0.08813	-0.88499	-0.88	0.09	0.02
0	20	23	6	9	9	2	34	30	0.59169	0.78581	-0.51839	0	0	0
1	20	19	5	13	25	20	40	33	-0.16791	0.08813	0.94802	0.95	0.09	-0.17
1	21	17	5	8	20	23	29	27	-0.54772	0.08813	-0.88499	-0.88	0.09	-0.55
1	20	26	4	14	30	9	44	35	1.1614	-0.60955	1.31462	1.31	-0.61	1.16
1	19	16	6	15	60	58	70	63	-0.73762	0.78581	1.68122	1.68	0.79	-0.74
1	20	16	4	13	18	22	38	40	-0.73762	-0.60955	0.94802	0.95	-0.61	-0.74
0	20	25	6	9	13	4	37	29	0.9715	0.78581	-0.51839	0	0	0
1	19	16	6	6	19	11	42	31	-0.73762	0.78581	-1.61819	-1.62	0.79	-0.74
1	20	28	6	9	20	31	34	27	1.5412	0.78581	-0.51839	-0.52	0.79	1.54
1	20	16	5	6	12	0	30	22	-0.73762	0.08813	-1.61819	-1.62	0.09	-0.74
1	19	27	4	7	27	18	42	29	1.3513	-0.60955	-1.25159	-1.25	-0.61	1.35
0	19	15	6	12	20	15	36	45	-0.92752	0.78581	0.58142	0	0	0
0	24	18	6	8	15	10	43	24	-0.35781	0.78581	-0.88499	0	0	0
0	24	21	4	8	14	12	33	33	0.21189	-0.60955	-0.88499	0	0	0
0	28	23	5	9	26	24	48	22	0.59169	0.08813	-0.51839	0	0	0
1	35	17	3	5	34	32	51	42	-0.54772	-1.30723	-1.9848	-1.98	-1.31	-0.55
1	28	28	4	13	39	26	50	29	1.5412	-0.60955	0.94802	0.95	-0.61	1.54
1	19	27	6	14	25	27	47	35	1.3513	0.78581	1.31462	1.31	0.79	1.35
1	19	28	7	12	10	22	36	32	1.5412	1.48349	0.58142	0.58	1.48	1.54
1	19	22	5	12	30	35	56	38	0.40179	0.08813	0.58142	0.58	0.09	0.4
1	19	14	4	9	22	18	42	30	-1.11742	-0.60955	-0.51839	-0.52	-0.61	-1.12
1	19	16	4	10	28	25	51	40	-0.73762	-0.60955	-0.15179	-0.15	-0.61	-0.74
1	19	14	5	8	23	16	45	27	-1.11742	0.08813	-0.88499	-0.88	0.09	-1.12
1	20	15	6	15	7	7	39	27	-0.92752	0.78581	1.68122	1.68	0.79	-0.93
1	19	18	5	8	14	10	38	25	-0.35781	0.08813	-0.88499	-0.88	0.09	-0.36
1	19	31	4	10	33	26	41	42	2.11091	-0.60955	-0.15179	-0.15	-0.61	2.11
1	19	18	4	13	45	24	66	47	-0.35781	-0.60955	0.94802	0.95	-0.61	-0.36
1	22	30	7	13	21	9	45	34	1.92101	1.48349	0.94802	0.95	1.48	1.92
0	23	16	5	8	59	18	62	43	-0.73762	0.08813	-0.88499	0	0	0
1	20	15	8	11	23	20	50	39	-0.92752	2.18117	0.21482	0.21	2.18	-0.93
1	19	25	6	13	23	15	55	47	0.9715	0.78581	0.94802	0.95	0.79	0.97
1	19	18	5	12	14	10	29	21	-0.35781	0.08813	0.58142	0.58	0.09	-0.36
1	20	23	6	10	24	9	43	33	0.59169	0.78581	-0.15179	-0.15	0.79	0.59
1	19	17	3	7	15	13	35	35	-0.54772	-1.30723	-1.25159	-1.25	-1.31	-0.55
1	19	25	5	8	26	18	32	20	0.9715	0.08813	-0.88499	-0.88	0.09	0.97
1	19	27	7	14	19	20	48	42	1.3513	1.48349	1.31462	1.31	1.48	1.35
1	19	21	4	11	21	13	49	28	0.21189	-0.60955	0.21482	0.21	-0.61	0.21
1	19	14	5	7	20	8	24	23	-1.11742	0.08813	-1.25159	-1.25	0.09	-1.12
1	19	25	5	15	20	7	49	55	0.9715	0.08813	1.68122	1.68	0.09	0.97
1	18	32	9	14	35	34	46	48	2.30081	2.87885	1.31462	1.31	2.88	2.3
1	19	19	5	15	29	0	45	45	-0.16791	0.08813	1.68122	1.68	0.09	-0.17
1	19	19	3	8	29	34	47	36	-0.16791	-1.30723	-0.88499	-0.88	-1.31	-0.17
1	19	26	5	13	27	27	48	35	1.1614	0.08813	0.94802	0.95	0.09	1.16
1	19	30	3	10	10	8	63	52	1.92101	-1.30723	-0.15179	-0.15	-1.31	1.92
1	19	30	6	11	27	19	44	45	1.92101	0.78581	0.21482	0.21	0.79	1.92
1	19	26	4	10	51	44	59	50	1.1614	-0.60955	-0.15179	-0.15	-0.61	1.16
1	18	17	4	11	19	22	47	51	-0.54772	-0.60955	0.21482	0.21	-0.61	-0.55
1	19	23	5	11	9	11	33	25	0.59169	0.08813	0.21482	0.21	0.09	0.59
1	19	17	4	10	26	22	47	50	-0.54772	-0.60955	-0.15179	-0.15	-0.61	-0.55
1	19	24	7	12	21	25	47	34	0.7816	1.48349	0.58142	0.58	1.48	0.78
1	19	19	5	11	30	27	58	38	-0.16791	0.08813	0.21482	0.21	0.09	-0.17
1	19	23	6	15	60	39	68	70	0.59169	0.78581	1.68122	1.68	0.79	0.59
1	19	14	5	8	13	15	33	29	-1.11742	0.08813	-0.88499	-0.88	0.09	-1.12
1	20	18	7	11	28	32	48	43	-0.35781	1.48349	0.21482	0.21	1.48	-0.36
0	19	22	6	10	35	25	48	34	0.40179	0.78581	-0.15179	0	0	0
1	18	20	5	11	39	38	64	58	0.02199	0.08813	0.21482	0.21	0.09	0.02
1	20	16	4	15	29	18	61	60	-0.73762	-0.60955	1.68122	1.68	-0.61	-0.74
1	20	16	5	11	40	42	54	46	-0.73762	0.08813	0.21482	0.21	0.09	-0.74
1	19	26	5	6	23	11	32	24	1.1614	0.08813	-1.61819	-1.62	0.09	1.16
1	19	14	3	6	49	44	53	47	-1.11742	-1.30723	-1.61819	-1.62	-1.31	-1.12
1	19	13	3	13	26	21	45	32	-1.30732	-1.30723	0.94802	0.95	-1.31	-1.31
1	19	23	5	6	15	15	40	27	0.59169	0.08813	-1.61819	-1.62	0.09	0.59
1	18	14	5	12	18	10	51	53	-1.11742	0.08813	0.58142	0.58	0.09	-1.12
1	19	27	5	15	30	21	44	36	1.3513	0.08813	1.68122	1.68	0.09	1.35
1	19	15	3	12	30	26	58	46	-0.92752	-1.30723	0.58142	0.58	-1.31	-0.93
1	20	16	3	8	33	31	44	26	-0.73762	-1.30723	-0.88499	-0.88	-1.31	-0.74
0	19	28	8	14	10	6	29	28	1.5412	2.18117	1.31462	0	0	0
1	19	21	6	11	33	33	54	44	0.21189	0.78581	0.21482	0.21	0.79	0.21
1	21	28	4	12	24	34	44	43	1.5412	-0.60955	0.58142	0.58	-0.61	1.54
0	20	19	4	10	34	32	34	32	-0.16791	-0.60955	-0.15179	0	0	0
0	19	25	6	16	22	19	47	31	0.9715	0.78581	2.04783	0	0	0
1	20	26	8	10	39	32	49	43	1.1614	2.18117	-0.15179	-0.15	2.18	1.16
0	19	22	6	11	12	18	41	29	0.40179	0.78581	0.21482	0	0	0
1	18	13	3	7	20	16	27	33	-1.30732	-1.30723	-1.25159	-1.25	-1.31	-1.31
1	19	12	5	16	47	47	64	64	-1.49723	0.08813	2.04783	2.05	0.09	-1.5
1	20	23	5	15	29	32	54	48	0.59169	0.08813	1.68122	1.68	0.09	0.59
1	20	24	7	8	31	30	39	33	0.7816	1.48349	-0.88499	-0.88	1.48	0.78
1	19	16	7	6	5	5	26	21	-0.73762	1.48349	-1.61819	-1.62	1.48	-0.74
1	20	23	4	8	18	15	33	20	0.59169	-0.60955	-0.88499	-0.88	-0.61	0.59
1	21	13	5	7	21	15	36	34	-1.30732	0.08813	-1.25159	-1.25	0.09	-1.31
1	19	15	6	9	43	36	56	55	-0.92752	0.78581	-0.51839	-0.52	0.79	-0.93
1	19	19	4	9	39	22	45	31	-0.16791	-0.60955	-0.51839	-0.52	-0.61	-0.17
1	18	15	5	7	15	14	45	33	-0.92752	0.08813	-1.25159	-1.25	0.09	-0.93
1	19	14	4	11	43	51	68	50	-1.11742	-0.60955	0.21482	0.21	-0.61	-1.12
1	19	21	8	11	48	37	47	45	0.21189	2.18117	0.21482	0.21	2.18	0.21
0	20	16	3	7	24	17	40	21	-0.73762	-1.30723	-1.25159	0	0	0
1	19	20	4	7	28	30	43	36	0.02199	-0.60955	-1.25159	-1.25	-0.61	0.02
1	19	21	6	13	32	19	57	41	0.21189	0.78581	0.94802	0.95	0.79	0.21
1	19	13	4	10	20	13	37	31	-1.30732	-0.60955	-0.15179	-0.15	-0.61	-1.31
1	19	15	5	5	33	19	33	29	-0.92752	0.08813	-1.9848	-1.98	0.09	-0.93
0	22	26	7	13	40	27	72	62	1.1614	1.48349	0.94802	0	0	0
1	19	25	7	9	22	26	39	40	0.9715	1.48349	-0.51839	-0.52	1.48	0.97
1	19	25	5	8	29	28	46	42	0.9715	0.08813	-0.88499	-0.88	0.09	0.97
1	19	16	5	14	13	11	41	34	-0.73762	0.08813	1.31462	1.31	0.09	-0.74
1	20	19	5	9	20	15	39	30	-0.16791	0.08813	-0.51839	-0.52	0.09	-0.17
1	20	23	4	10	37	20	40	40	0.59169	-0.60955	-0.15179	-0.15	-0.61	0.59
1	21	28	4	14	44	42	57	54	1.5412	-0.60955	1.31462	1.31	-0.61	1.54
1	19	14	3	8	37	26	62	48	-1.11742	-1.30723	-0.88499	-0.88	-1.31	-1.12
1	18	19	5	16	33	12	58	54	-0.16791	0.08813	2.04783	2.05	0.09	-0.17
0	19	34	8	13	19	17	49	41	2.68061	2.18117	0.94802	0	0	0
1	19	21	5	19	51	51	71	63	0.21189	0.08813	3.14763	3.15	0.09	0.21
1	19	11	3	7	20	14	42	22	-1.68713	-1.30723	-1.25159	-1.25	-1.31	-1.69
1	19	26	3	9	30	12	32	27	1.1614	-1.30723	-0.51839	-0.52	-1.31	1.16
1	19	16	3	8	25	7	42	40	-0.73762	-1.30723	-0.88499	-0.88	-1.31	-0.74
1	19	21	6	8	31	32	53	26	0.21189	0.78581	-0.88499	-0.88	0.79	0.21
1	20	26	5	15	21	8	40	45	1.1614	0.08813	1.68122	1.68	0.09	1.16
0	19	14	9	12	13	13	50	47	-1.11742	2.87885	0.58142	0	0	0
1	19	20	6	8	26	21	57	43	0.02199	0.78581	-0.88499	-0.88	0.79	0.02
0	19	18	7	9	0	0	37	20	-0.35781	1.48349	-0.51839	0	0	0
1	20	23	5	9	34	24	38	32	0.59169	0.08813	-0.51839	-0.52	0.09	0.59
1	23	12	3	13	31	27	53	49	-1.49723	-1.30723	0.94802	0.95	-1.31	-1.5
0	19	28	11	13	27	14	43	40	1.5412	4.27421	0.94802	0	0	0
1	19	27	6	10	37	35	60	44	1.3513	0.78581	-0.15179	-0.15	0.79	1.35
1	19	20	5	8	36	32	56	44	0.02199	0.08813	-0.88499	-0.88	0.09	0.02
0	20	16	5	11	13	8	31	37	-0.73762	0.08813	0.21482	0	0	0
1	20	11	3	11	31	34	31	34	-1.68713	-1.30723	0.21482	0.21	-1.31	-1.69
1	20	19	6	11	36	27	49	38	-0.16791	0.78581	0.21482	0.21	0.79	-0.17
1	19	18	6	5	33	18	48	41	-0.35781	0.78581	-1.9848	-1.98	0.79	-0.36
1	20	21	6	9	45	35	48	69	0.21189	0.78581	-0.51839	-0.52	0.79	0.21
0	20	34	7	14	20	22	30	25	2.68061	1.48349	1.31462	0	0	0
1	19	21	4	12	30	27	39	52	0.21189	-0.60955	0.58142	0.58	-0.61	0.21
1	19	11	3	6	42	31	60	53	-1.68713	-1.30723	-1.61819	-1.62	-1.31	-1.69
1	19	29	6	16	35	26	47	30	1.7311	0.78581	2.04783	2.05	0.79	1.73
1	20	14	5	5	20	20	40	33	-1.11742	0.08813	-1.9848	-1.98	0.09	-1.12
1	21	19	5	9	16	13	38	34	-0.16791	0.08813	-0.51839	-0.52	0.09	-0.17
1	19	28	4	15	21	19	41	30	1.5412	-0.60955	1.68122	1.68	-0.61	1.54
1	19	20	4	9	26	21	26	25	0.02199	-0.60955	-0.51839	-0.52	-0.61	0.02
1	20	16	5	11	14	9	36	25	-0.73762	0.08813	0.21482	0.21	0.09	-0.74
0	19	17	8	10	42	34	58	45	-0.54772	2.18117	-0.15179	0	0	0
1	19	24	5	17	16	6	47	42	0.7816	0.08813	2.41443	2.41	0.09	0.78
1	19	11	4	9	42	35	44	29	-1.68713	-0.60955	-0.51839	-0.52	-0.61	-1.69
1	19	25	5	12	18	29	47	45	0.9715	0.08813	0.58142	0.58	0.09	0.97
1	19	27	4	13	29	23	43	35	1.3513	-0.60955	0.94802	0.95	-0.61	1.35
1	19	20	3	12	30	17	45	29	0.02199	-1.30723	0.58142	0.58	-1.31	0.02
1	19	27	4	14	16	16	52	58	1.3513	-0.60955	1.31462	1.31	-0.61	1.35
0	19	13	5	6	27	22	29	20	-1.30732	0.08813	-1.61819	0	0	0
1	19	24	7	11	37	26	47	39	0.7816	1.48349	0.21482	0.21	1.48	0.78
1	19	12	3	11	34	19	54	33	-1.49723	-1.30723	0.21482	0.21	-1.31	-1.5
1	19	15	4	14	42	34	55	41	-0.92752	-0.60955	1.31462	1.31	-0.61	-0.93
1	19	22	3	9	8	4	26	27	0.40179	-1.30723	-0.51839	-0.52	-1.31	0.4
0	19	20	5	11	23	15	61	33	0.02199	0.08813	0.21482	0	0	0
1	20	27	7	12	27	26	45	27	1.3513	1.48349	0.58142	0.58	1.48	1.35
1	19	23	7	12	31	38	61	54	0.59169	1.48349	0.58142	0.58	1.48	0.59
1	19	21	6	7	16	15	25	23	0.21189	0.78581	-1.25159	-1.25	0.79	0.21
1	19	20	4	10	18	14	45	39	0.02199	-0.60955	-0.15179	-0.15	-0.61	0.02
1	18	15	4	12	5	8	37	41	-0.92752	-0.60955	0.58142	0.58	-0.61	-0.93
1	20	25	4	11	20	11	38	30	0.9715	-0.60955	0.21482	0.21	-0.61	0.97
1	19	19	4	12	32	12	53	63	-0.16791	-0.60955	0.58142	0.58	-0.61	-0.17
1	20	17	4	10	31	23	46	33	-0.54772	-0.60955	-0.15179	-0.15	-0.61	-0.55
1	19	11	6	11	27	24	36	38	-1.68713	0.78581	0.21482	0.21	0.79	-1.69
1	19	26	7	14	14	41	37	30	1.1614	1.48349	1.31462	1.31	1.48	1.16
1	20	21	5	7	31	18	40	33	0.21189	0.08813	-1.25159	-1.25	0.09	0.21
0	23	15	5	7	30	16	47	31	-0.92752	0.08813	-1.25159	0	0	0
1	24	20	4	12	15	9	28	25	0.02199	-0.60955	0.58142	0.58	-0.61	0.02
1	26	12	8	8	19	2	40	31	-1.49723	2.18117	-0.88499	-0.88	2.18	-1.5
0	25	11	6	5	24	18	28	20	-1.68713	0.78581	-1.9848	0	0	0
1	22	13	3	7	12	13	41	34	-1.30732	-1.30723	-1.25159	-1.25	-1.31	-1.31
1	22	23	3	9	35	25	43	55	0.59169	-1.30723	-0.51839	-0.52	-1.31	0.59
1	18	14	3	10	45	45	59	45	-1.11742	-1.30723	-0.15179	-0.15	-1.31	-1.12
1	18	14	4	10	23	26	56	31	-1.11742	-0.60955	-0.15179	-0.15	-0.61	-1.12
1	21	18	3	8	15	22	36	26	-0.35781	-1.30723	-0.88499	-0.88	-1.31	-0.36
1	19	15	4	10	21	14	37	29	-0.92752	-0.60955	-0.15179	-0.15	-0.61	-0.93
1	18	16	4	10	21	18	51	42	-0.73762	-0.60955	-0.15179	-0.15	-0.61	-0.74
0	18	16	9	12	12	14	40	42	-0.73762	2.87885	0.58142	0	0	0
1	18	13	4	8	26	12	59	49	-1.30732	-0.60955	-0.88499	-0.88	-0.61	-1.31
1	18	29	4	11	38	44	66	54	1.7311	-0.60955	0.21482	0.21	-0.61	1.73
1	20	20	4	14	39	35	51	40	0.02199	-0.60955	1.31462	1.31	-0.61	0.02
1	18	22	8	9	6	6	35	43	0.40179	2.18117	-0.51839	-0.52	2.18	0.4
1	18	27	5	12	23	29	50	43	1.3513	0.08813	0.58142	0.58	0.09	1.35
0	18	14	3	7	25	17	39	39	-1.11742	-1.30723	-1.25159	0	0	0
1	18	20	3	13	16	4	45	35	0.02199	-1.30723	0.94802	0.95	-1.31	0.02
1	18	20	4	11	28	17	50	29	0.02199	-0.60955	0.21482	0.21	-0.61	0.02
1	18	13	5	15	50	31	66	38	-1.30732	0.08813	1.68122	1.68	0.09	-1.31
1	18	11	3	8	39	41	58	64	-1.68713	-1.30723	-0.88499	-0.88	-1.31	-1.69
1	18	17	6	11	48	44	47	44	-0.54772	0.78581	0.21482	0.21	0.79	-0.55
1	18	27	4	9	52	46	57	50	1.3513	-0.60955	-0.51839	-0.52	-0.61	1.35
0	18	23	5	14	44	37	66	55	0.59169	0.08813	1.31462	0	0	0
1	18	15	3	11	9	5	29	26	-0.92752	-1.30723	0.21482	0.21	-1.31	-0.93
1	18	21	4	13	35	35	58	40	0.21189	-0.60955	0.94802	0.95	-0.61	0.21
1	18	22	4	11	24	16	50	39	0.40179	-0.60955	0.21482	0.21	-0.61	0.4
1	18	22	6	12	33	29	42	32	0.40179	0.78581	0.58142	0.58	0.79	0.4
1	18	24	5	13	14	11	37	33	0.7816	0.08813	0.94802	0.95	0.09	0.78
1	18	23	4	15	32	33	54	40	0.59169	-0.60955	1.68122	1.68	-0.61	0.59
1	19	18	3	12	36	33	57	60	-0.35781	-1.30723	0.58142	0.58	-1.31	-0.36
1	18	20	4	7	25	27	38	35	0.02199	-0.60955	-1.25159	-1.25	-0.61	0.02
1	18	19	4	17	48	49	65	47	-0.16791	-0.60955	2.41443	2.41	-0.61	-0.17
1	19	23	7	10	7	7	39	23	0.59169	1.48349	-0.15179	-0.15	1.48	0.59
1	18	11	3	13	8	2	46	32	-1.68713	-1.30723	0.94802	0.95	-1.31	-1.69
1	18	22	3	12	22	16	28	22	0.40179	-1.30723	0.58142	0.58	-1.31	0.4
1	18	18	6	14	35	29	54	49	-0.35781	0.78581	1.31462	1.31	0.79	-0.36
1	18	14	3	6	36	39	45	37	-1.11742	-1.30723	-1.61819	-1.62	-1.31	-1.12
1	18	27	5	11	17	16	43	32	1.3513	0.08813	0.21482	0.21	0.09	1.35
1	18	23	5	9	25	28	40	23	0.59169	0.08813	-0.51839	-0.52	0.09	0.59
1	18	16	5	5	18	8	23	21	-0.73762	0.08813	-1.9848	-1.98	0.09	-0.74
1	19	12	3	9	25	23	46	34	-1.49723	-1.30723	-0.51839	-0.52	-1.31	-1.5
1	19	23	3	13	15	5	51	51	0.59169	-1.30723	0.94802	0.95	-1.31	0.59
1	18	17	4	8	24	18	44	28	-0.54772	-0.60955	-0.88499	-0.88	-0.61	-0.55
1	18	24	7	12	18	29	49	43	0.7816	1.48349	0.58142	0.58	1.48	0.78
1	19	31	6	9	17	5	38	37	2.11091	0.78581	-0.51839	-0.52	0.79	2.11
1	19	29	4	9	12	34	30	22	1.7311	-0.60955	-0.51839	-0.52	-0.61	1.73
1	18	22	6	10	22	16	46	39	0.40179	0.78581	-0.15179	-0.15	0.79	0.4
1	22	13	4	13	61	54	77	78	-1.30732	-0.60955	0.94802	0.95	-0.61	-1.31
1	19	17	4	10	20	9	35	30	-0.54772	-0.60955	-0.15179	-0.15	-0.61	-0.55
1	18	13	4	9	42	42	55	35	-1.30732	-0.60955	-0.51839	-0.52	-0.61	-1.31
1	18	21	4	10	40	25	57	34	0.21189	-0.60955	-0.15179	-0.15	-0.61	0.21
1	18	21	5	13	30	14	43	28	0.21189	0.08813	0.94802	0.95	0.09	0.21
1	18	18	5	7	18	11	40	27	-0.35781	0.08813	-1.25159	-1.25	0.09	-0.36
1	18	27	5	15	20	17	39	31	1.3513	0.08813	1.68122	1.68	0.09	1.35
1	21	28	6	11	17	22	50	34	1.5412	0.78581	0.21482	0.21	0.79	1.54
1	18	13	5	14	23	18	60	41	-1.30732	0.08813	1.31462	1.31	0.09	-1.31
1	18	16	5	14	54	43	65	21	-0.73762	0.08813	1.31462	1.31	0.09	-0.74
1	18	24	4	10	32	30	50	46	0.7816	-0.60955	-0.15179	-0.15	-0.61	0.78
1	18	15	3	7	32	29	50	39	-0.92752	-1.30723	-1.25159	-1.25	-1.31	-0.93
1	18	15	3	10	21	18	51	30	-0.92752	-1.30723	-0.15179	-0.15	-1.31	-0.93
1	18	15	3	9	35	51	42	23	-0.92752	-1.30723	-0.51839	-0.52	-1.31	-0.93
1	18	20	5	10	15	16	40	41	0.02199	0.08813	-0.15179	-0.15	0.09	0.02
1	18	22	4	9	24	23	41	29	0.40179	-0.60955	-0.51839	-0.52	-0.61	0.4
0	18	27	6	10	27	22	44	33	1.3513	0.78581	-0.15179	0	0	0
1	18	15	3	11	28	21	44	28	-0.92752	-1.30723	0.21482	0.21	-1.31	-0.93
1	18	11	3	9	8	0	34	22	-1.68713	-1.30723	-0.51839	-0.52	-1.31	-1.69
0	18	15	3	12	26	24	63	52	-0.92752	-1.30723	0.58142	0	0	0
1	18	25	5	12	34	26	52	35	0.9715	0.08813	0.58142	0.58	0.09	0.97
1	18	23	5	9	10	8	29	21	0.59169	0.08813	-0.51839	-0.52	0.09	0.59
1	19	30	8	11	45	51	66	64	1.92101	2.18117	0.21482	0.21	2.18	1.92
1	18	29	7	14	59	39	46	49	1.7311	1.48349	1.31462	1.31	1.48	1.73
1	19	18	5	16	17	11	56	57	-0.35781	0.08813	2.04783	2.05	0.09	-0.36
1	18	19	7	8	36	40	57	49	-0.16791	1.48349	-0.88499	-0.88	1.48	-0.17
1	18	20	4	10	16	16	44	38	0.02199	-0.60955	-0.15179	-0.15	-0.61	0.02
1	18	15	5	7	27	15	35	33	-0.92752	0.08813	-1.25159	-1.25	0.09	-0.93
1	19	16	4	11	44	47	46	47	-0.73762	-0.60955	0.21482	0.21	-0.61	-0.74
1	18	26	5	9	24	13	48	43	1.1614	0.08813	-0.51839	-0.52	0.09	1.16
1	19	21	4	12	48	35	64	48	0.21189	-0.60955	0.58142	0.58	-0.61	0.21
1	18	20	6	9	19	24	48	39	0.02199	0.78581	-0.51839	-0.52	0.79	0.02
1	19	20	4	6	20	11	41	30	0.02199	-0.60955	-1.61819	-1.62	-0.61	0.02
1	19	16	3	11	44	41	68	61	-0.73762	-1.30723	0.21482	0.21	-1.31	-0.74
1	18	11	3	11	7	31	49	50	-1.68713	-1.30723	0.21482	0.21	-1.31	-1.69
1	19	23	5	11	30	38	58	48	0.59169	0.08813	0.21482	0.21	0.09	0.59
1	18	23	5	9	19	16	47	30	0.59169	0.08813	-0.51839	-0.52	0.09	0.59
1	18	16	5	11	30	20	40	22	-0.73762	0.08813	0.21482	0.21	0.09	-0.74
0	18	23	4	9	30	29	48	39	0.59169	-0.60955	-0.51839	0	0	0
0	18	24	6	13	26	35	50	33	0.7816	0.78581	0.94802	0	0	0
1	18	12	5	9	31	14	49	40	-1.49723	0.08813	-0.51839	-0.52	0.09	-1.5
1	18	13	5	10	52	49	66	42	-1.30732	0.08813	-0.15179	-0.15	0.09	-1.31
1	18	14	3	10	30	23	55	48	-1.11742	-1.30723	-0.15179	-0.15	-1.31	-1.12
1	18	23	8	9	45	45	54	39	0.59169	2.18117	-0.51839	-0.52	2.18	0.59
1	18	19	3	9	21	23	37	25	-0.16791	-1.30723	-0.51839	-0.52	-1.31	-0.17
1	19	16	4	10	22	21	45	28	-0.73762	-0.60955	-0.15179	-0.15	-0.61	-0.74
1	19	17	4	12	21	27	34	27	-0.54772	-0.60955	0.58142	0.58	-0.61	-0.55
1	18	17	4	6	28	29	30	28	-0.54772	-0.60955	-1.61819	-1.62	-0.61	-0.55
1	18	20	7	10	32	28	48	37	0.02199	1.48349	-0.15179	-0.15	1.48	0.02
0	18	26	4	13	27	19	51	34	1.1614	-0.60955	0.94802	0	0	0
1	18	25	7	10	19	13	48	51	0.9715	1.48349	-0.15179	-0.15	1.48	0.97
1	18	21	6	12	17	18	46	45	0.21189	0.78581	0.58142	0.58	0.79	0.21
1	18	15	6	6	17	13	30	23	-0.92752	0.78581	-1.61819	-1.62	0.79	-0.93
1	18	11	4	6	33	35	58	39	-1.68713	-0.60955	-1.61819	-1.62	-0.61	-1.69
1	18	19	5	13	31	26	44	47	-0.16791	0.08813	0.94802	0.95	0.09	-0.17
1	18	24	5	16	18	10	50	57	0.7816	0.08813	2.04783	2.05	0.09	0.78
1	18	19	3	7	34	29	48	28	-0.16791	-1.30723	-1.25159	-1.25	-1.31	-0.17
1	18	21	5	10	25	26	46	36	0.21189	0.08813	-0.15179	-0.15	0.09	0.21
1	18	22	6	9	28	22	36	24	0.40179	0.78581	-0.51839	-0.52	0.79	0.4
1	19	15	7	8	34	27	46	39	-0.92752	1.48349	-0.88499	-0.88	1.48	-0.93
1	18	25	5	16	32	24	49	25	0.9715	0.08813	2.04783	2.05	0.09	0.97
1	19	13	4	10	18	35	61	45	-1.30732	-0.60955	-0.15179	-0.15	-0.61	-1.31
0	18	17	4	6	25	17	38	33	-0.54772	-0.60955	-1.61819	0	0	0
1	18	11	3	10	21	12	49	30	-1.68713	-1.30723	-0.15179	-0.15	-1.31	-1.69
1	19	18	4	10	28	14	37	31	-0.35781	-0.60955	-0.15179	-0.15	-0.61	-0.36
1	18	26	5	10	18	15	33	29	1.1614	0.08813	-0.15179	-0.15	0.09	1.16
0	18	15	3	9	18	16	51	40	-0.92752	-1.30723	-0.51839	0	0	0
1	18	26	3	9	27	25	35	31	1.1614	-1.30723	-0.51839	-0.52	-1.31	1.16
1	18	18	7	10	17	22	40	33	-0.35781	1.48349	-0.15179	-0.15	1.48	-0.36
1	18	15	4	11	13	12	62	41	-0.92752	-0.60955	0.21482	0.21	-0.61	-0.93
0	20	28	5	10	12	17	38	28	1.5412	0.08813	-0.15179	0	0	0
1	18	18	4	8	31	17	54	42	-0.35781	-0.60955	-0.88499	-0.88	-0.61	-0.36
1	18	24	3	6	22	13	46	31	0.7816	-1.30723	-1.61819	-1.62	-1.31	0.78
1	18	20	5	7	34	37	38	36	0.02199	0.08813	-1.25159	-1.25	0.09	0.02
1	18	15	5	10	26	21	47	33	-0.92752	0.08813	-0.15179	-0.15	0.09	-0.93
1	18	13	3	8	16	19	53	38	-1.30732	-1.30723	-0.88499	-0.88	-1.31	-1.31
1	19	23	5	11	26	25	44	44	0.59169	0.08813	0.21482	0.21	0.09	0.59
0	18	20	4	10	25	22	45	37	0.02199	-0.60955	-0.15179	0	0	0
1	18	14	4	6	20	13	45	35	-1.11742	-0.60955	-1.61819	-1.62	-0.61	-1.12
