# Supplementary material for: Relations of Distinct Psychopathic Personality Traits with Anxiety and Fear: Findings from Offenders and Non-Offenders
Source: PLoS One. 2015 Nov 16;10(11):e0143120. doi: 10.1371/journal.pone.0143120 (PMC4646576; doi:10.1371/journal.pone.0143120)
Supplement: S2 File — (XLSX) [file pone.0143120.s002.xlsx]

## Sheet: Sheet1
FearAnxiety	Avoidance	Egocentricity	Callous	Antisocial	State	Trait	Anger	Disgust	Fear	Happy	Sad	Surprise	ZEgocentricity	ZCallous	ZAntisocial
9	8	21	7	6	20	20	20	19	12	20	17	15	0.894	-0.14405	-1.46478
4	3	10	4	6	20	36	14	11	8	17	13	15	-1.17257	-1.10805	-1.46478
60	51	14	16	12	59	62	17	18	0	20	15	19	-0.42109	2.74796	0.12817
23	36	10	4	7	21	45	18	18	5	20	15	20	-1.17257	-1.10805	-1.19929
13	15	10	5	7	28	42	20	13	10	20	16	17	-1.17257	-0.78671	-1.19929
55	39	20	9	13	58	60	18	19	8	18	19	18	0.70613	0.49862	0.39366
19	19	15	13	14	26	42	19	18	9	15	17	15	-0.23322	1.78396	0.65915
30	16	14	8	8	38	50	20	18	15	20	19	20	-0.42109	0.17729	-0.9338
43	33	13	6	9	27	48	16	10	14	19	18	15	-0.60896	-0.46538	-0.66831
47	38	25	9	15	32	47	7	5	8	17	8	4	1.64548	0.49862	0.92465
27	24	12	10	8	33	32	18	17	4	20	18	20	-0.79683	0.81995	-0.9338
49	39	14	7	19			17	17	16	19	14	16	-0.42109	-0.14405	1.98661
8	2	10	4	10	31	35	20	16	15	20	17	18	-1.17257	-1.10805	-0.40282
22	15	21	9	15	39	45	14	18	5	20	17	19	0.894	0.49862	0.92465
44	30	15	7	16	47	49	18	17	2	19	19	20	-0.23322	-0.14405	1.19014
28	24	14	7	15	22	54	19	17	18	20	18	14	-0.42109	-0.14405	0.92465
15	9	19	6	14	24	33	20	14	5	20	19	19	0.51826	-0.46538	0.65915
9	10	34	15	18	29	38	20	18	3	20	19	19	3.33631	2.42662	1.72112
5	8	13	7	11	32	37	18	16	10	20	17	18	-0.60896	-0.14405	-0.13732
45	23	21	6	10	46	45	20	17	10	20	19	17	0.894	-0.46538	-0.40282
24	18	16	4	8	23	28	19	16	18	20	19	12	-0.04535	-1.10805	-0.9338
43	44	13	4	8	27	42	19	16	9	20	16	17	-0.60896	-1.10805	-0.9338
42	25	14	7	17	45	58	18	14	17	16	14	12	-0.42109	-0.14405	1.45563
32	32	18	8	13			10	12	7	19	14	9	0.33039	0.17729	0.39366
21	17	20	9	13	23	31	18	19	13	19	17	16	0.70613	0.49862	0.39366
18	20	23	9	12			19	16	11	20	15	18	1.26974	0.49862	0.12817
27	12	14	5	12	20	41	18	18	15	18	18	17	-0.42109	-0.78671	0.12817
22	8	14	4	6	22	31	20	16	3	20	16	18	-0.42109	-1.10805	-1.46478
45	19	14	7	12	24	42	20	11	9	20	17	12	-0.42109	-0.14405	0.12817
